# Supplementary material for: Risk assessment of soil heavy metal contamination at the census tract level in the city of Santa Ana, CA: implications for health and environmental justice
Source: PubMed Central journal article supplement — Environ Sci Process Impacts. 2021 May 6;23(6):812–30. doi: 10.1039/d1em00007a (PMC8224146; doi:10.1039/d1em00007a), 2021-05-06
Supplement: EM-023-D1EM00007A-s004.pdf [file EM-023-D1EM00007A-s004.pdf]

# CITY OF SANTA ANA ZONING MAP

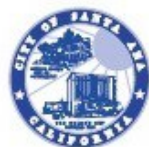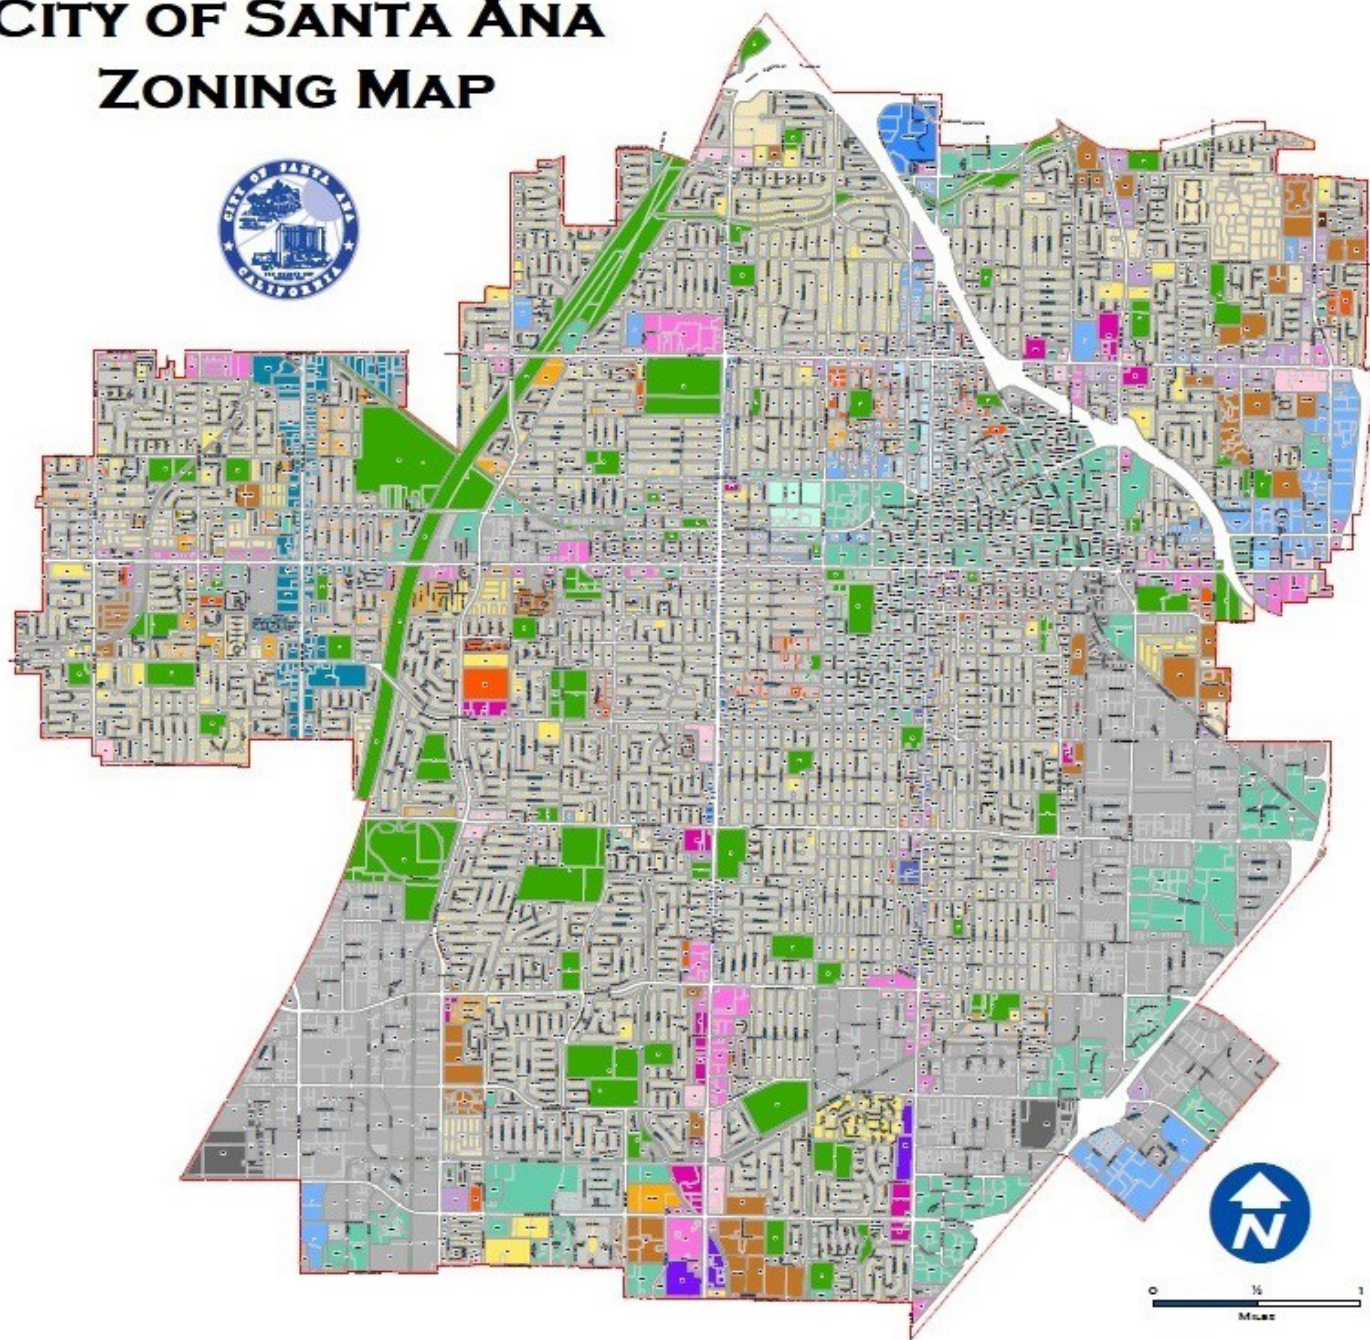

## ZONING DISTRICTS

- |                       |           |                                                   |
|-----------------------|-----------|---------------------------------------------------|
|                       | A1        | GENERAL AGRICULTURAL                              |
|                       | R1        | SINGLE-FAMILY RESIDENCE                           |
|                       | R2        | TWO-FAMILY RESIDENCE                              |
|                       | R3        | MULTIPLE-FAMILY RESIDENCE                         |
|                       | R4        | SUBURBAN APARTMENT                                |
|                       | RE        | RESIDENTIAL ESTATE                                |
|                       | C1        | COMMUNITY COMMERCIAL                              |
|                       | C2        | GENERAL COMMERCIAL                                |
|                       | C4        | PLANNED SHOPPING CENTER                           |
|                       | C5        | ARTERIAL COMMERCIAL                               |
|                       | CR        | COMMERCIAL RESIDENTIAL                            |
|                       | CSM       | SOUTH MAIN STREET COMMERCIAL DISTRICT             |
|                       | P         | PROFESSIONAL                                      |
|                       | GC        | GOVERNMENT CENTER                                 |
|                       | SD        | SPECIFIC DEVELOPMENT                              |
|                       | M1        | LIGHT INDUSTRIAL                                  |
|                       | M2        | HEAVY INDUSTRIAL                                  |
|                       | O         | OPEN SPACE LAND                                   |
|                       | OZ1       | METRO EAST MIXED USE OVERLAY ZONE                 |
| <b>SPECIFIC PLANS</b> |           |                                                   |
|                       | SP1       | BRISTOL STREET CORRIDOR SPECIFIC PLAN             |
|                       | SP2       | HARBOR MIXED USE TRANSIT CORRIDOR SPECIFIC PLAN   |
|                       | SP3       | MIDTOWN SPECIFIC PLAN                             |
|                       | SP4       | MAINPLACE SPECIFIC PLAN                           |
| <b>SUFFIXES</b>       |           |                                                   |
|                       | -B        | PARKING MODIFICATION                              |
|                       | -OZ1      | METRO EAST MIXED USE OVERLAY ZONE                 |
|                       | -OZ-M1/M2 | TRANSIT ZONING CODE M1/M2 INDUSTRIAL OVERLAY ZONE |
|                       | -PRD      | PLANNED RESIDENTIAL DEVELOPMENT                   |
|                       | -HDII     | HEIGHT DISTRICT II                                |
|                       | -MD       | MUSEUM DISTRICT                                   |
