# Supplementary material for: Risk assessment of soil heavy metal contamination at the census tract level in the city of Santa Ana, CA: implications for health and environmental justice
Source: PubMed Central journal article supplement — Environ Sci Process Impacts. 2021 May 6;23(6):812–30. doi: 10.1039/d1em00007a (PMC8224146; doi:10.1039/d1em00007a), 2021-05-06

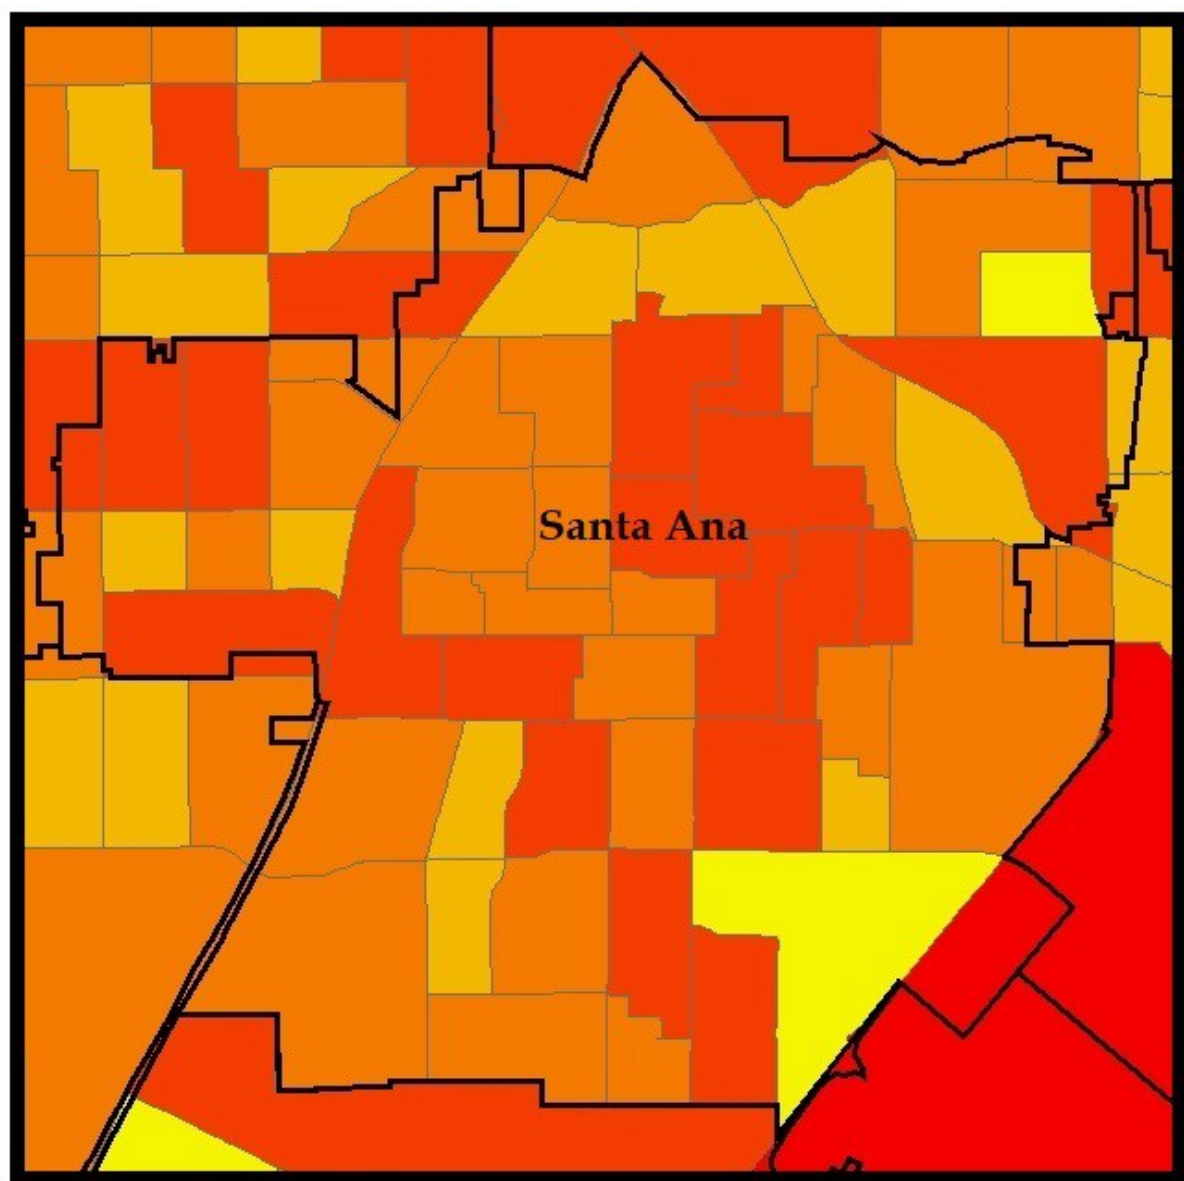

□ Census Tract Boundary

□ City Boundary

**Total population**

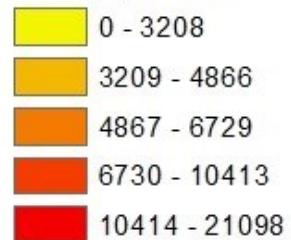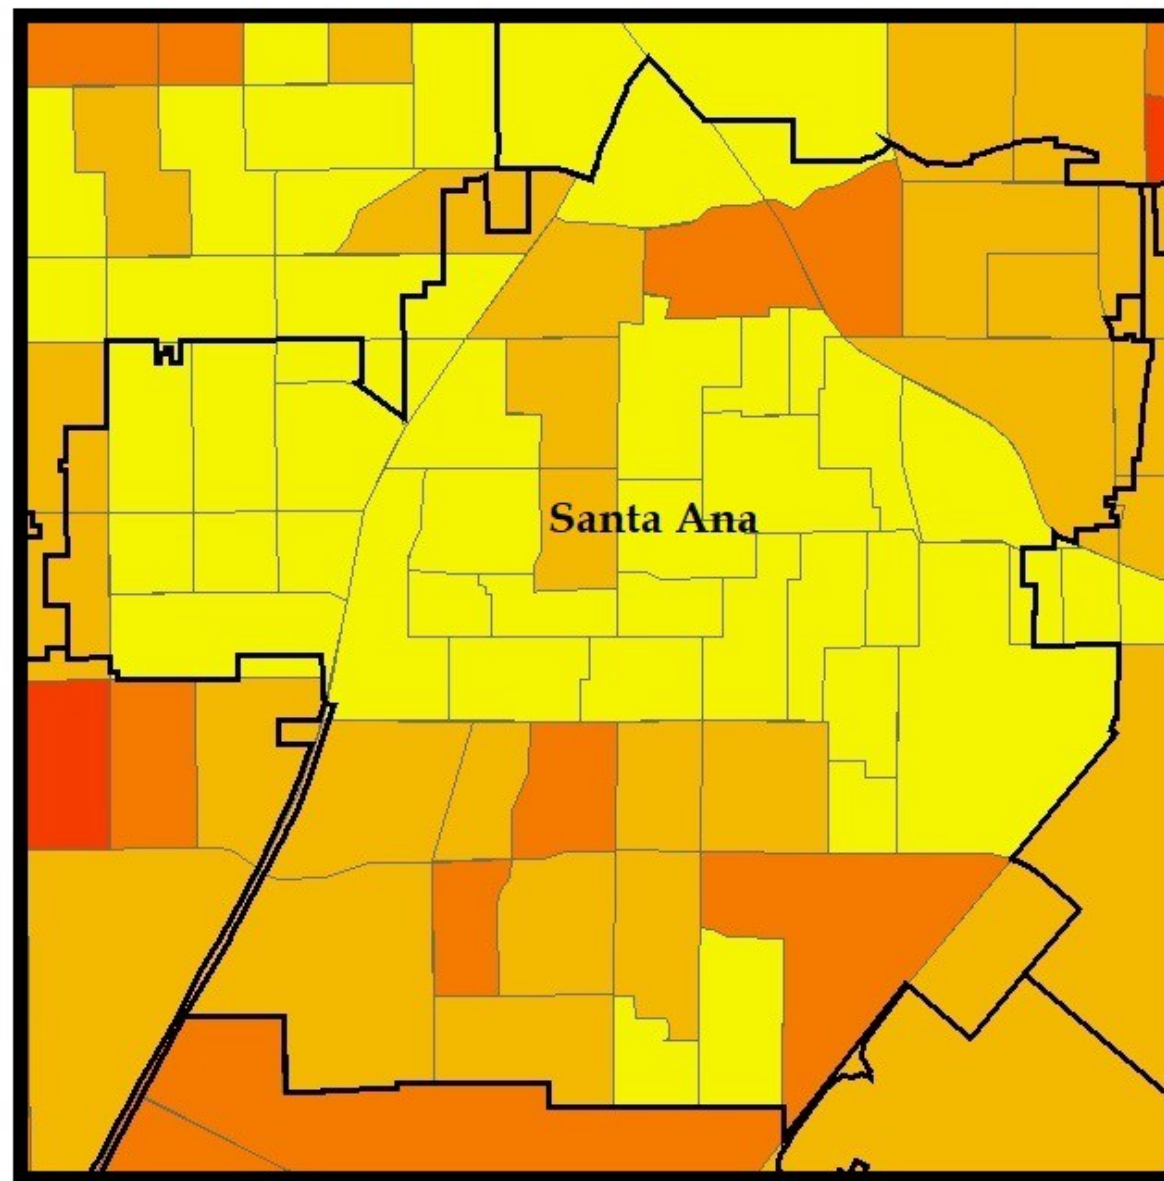

□ Census Tract Boundary

□ City Boundary

**Median Household Income (USD)**

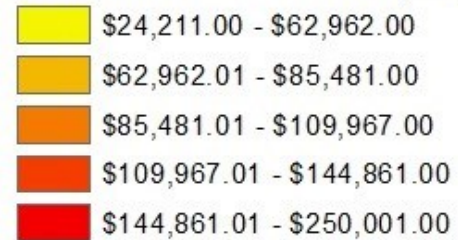

Supplement: EM-023-D1EM00007A-s005.pdf [file EM-023-D1EM00007A-s005.pdf]
