# Supplementary material for: Risk assessment of soil heavy metal contamination at the census tract level in the city of Santa Ana, CA: implications for health and environmental justice
Source: PubMed Central journal article supplement — Environ Sci Process Impacts. 2021 May 6;23(6):812–30. doi: 10.1039/d1em00007a (PMC8224146; doi:10.1039/d1em00007a), 2021-05-06
Supplement: EM-023-D1EM00007A-s006.pdf [file EM-023-D1EM00007A-s006.pdf]

### Supplemental Materials

**Table S1.** Distribution (%) of soil samples across five categories of enrichment based on enrichment factor index.

|                           | Pb   | As   | Mn   | Cr   | Ni   | Cu   | Cd   | Zn   |
|---------------------------|------|------|------|------|------|------|------|------|
| No or Minimal Enrichment  | 32.8 | 59.1 | 98.3 | 97.2 | 99.0 | 80.4 | 99.5 | 15.8 |
| Moderate Enrichment       | 50.2 | 35.0 | 1.6  | 2.8  | 0.9  | 17.4 | 0.5  | 68.0 |
| Significant Enrichment    | 15.0 | 5.7  | 0.1  |      | 0.1  | 2.0  |      | 15.8 |
| Very High Enrichment      | 1.3  | 0.1  |      |      |      | 0.1  |      | 0.4  |
| Extremely High Enrichment | 0.7  | 0.1  |      |      |      | 0.1  |      |      |

\*Al was used as reference element.

**Table S2.** Pearson correlation coefficients (r) and p-values when plotting the average of demographic characteristics against average heavy metal concentrations and corresponding risk at the Census tract (n=61) level.

|                            |         | Pb           | Mn           | As           | Cr           | Ni          | Cu          | Cd           | Zn           | Non-Cancer Risk (lower) | Non-Cancer Risk (upper) | Cancer Risk (lower) | Cancer Risk (upper) |
|----------------------------|---------|--------------|--------------|--------------|--------------|-------------|-------------|--------------|--------------|-------------------------|-------------------------|---------------------|---------------------|
| % Immigrant                | r       | 0.06         | <b>0.34</b>  | <b>-0.39</b> | <b>-0.39</b> | 0.14        | -0.21       | 0.003        | 0.08         | -0.13                   | -0.13                   | <b>-0.30</b>        | <b>-0.38</b>        |
|                            | p-value | 0.66         | 0.01         | 0.00         | 0.00         | 0.30        | 0.10        | 0.99         | 0.54         | 0.31                    | 0.31                    | 0.02                | 0.00                |
| % Immigrant (Latina/o/x)   | r       | 0.21         | -0.16        | 0.04         | 0.15         | 0.13        | -0.18       | 0.04         | -0.19        | -0.13                   | -0.13                   | 0.05                | 0.05                |
|                            | p-value | 0.10         | 0.22         | 0.78         | 0.26         | 0.33        | 0.16        | 0.75         | 0.15         | 0.32                    | 0.31                    | 0.67                | 0.72                |
| % Immigrant (Asian)        | r       | -0.28        | <b>0.64</b>  | <b>-0.53</b> | <b>-0.32</b> | -0.21       | -0.28       | <b>-0.38</b> | <b>-0.30</b> | <b>-0.43</b>            | <b>-0.41</b>            | <b>-0.57</b>        | <b>-0.54</b>        |
|                            | p-value | 0.03         | 0.00         | 0.00         | 0.01         | 0.11        | 0.03        | 0.00         | 0.02         | 0.00                    | 0.00                    | 0.00                | 0.00                |
| % Non-English Speaking     | r       | 0.27         | 0.02         | -0.14        | <b>-0.30</b> | 0.14        | -0.14       | 0.15         | 0.29         | 0.12                    | 0.10                    | -0.06               | -0.14               |
|                            | p-value | 0.04         | 0.89         | 0.29         | 0.02         | 0.29        | 0.29        | 0.25         | 0.03         | 0.36                    | 0.42                    | 0.64                | 0.29                |
| % Hispanic                 | r       | 0.29         | <b>-0.30</b> | 0.18         | 0.00         | <b>0.35</b> | 0.07        | <b>0.36</b>  | <b>0.32</b>  | 0.27                    | 0.26                    | <b>0.30</b>         | 0.19                |
|                            | p-value | 0.03         | 0.02         | 0.17         | 1.00         | 0.01        | 0.61        | 0.00         | 0.01         | 0.03                    | 0.05                    | 0.02                | 0.14                |
| % College Education        | r       | -0.17        | -0.07        | 0.21         | <b>0.37</b>  | -0.17       | 0.18        | -0.10        | -0.17        | -0.02                   | -0.00                   | 0.13                | 0.21                |
|                            | p-value | 0.19         | 0.59         | 0.10         | 0.00         | 0.19        | 0.17        | 0.43         | 0.18         | 0.88                    | 0.98                    | 0.34                | 0.10                |
| % Without Health Insurance | r       | 0.24         | -0.16        | -0.01        | -0.26        | 0.17        | 0.10        | 0.20         | 0.26         | 0.16                    | 0.13                    | 0.06                | -0.01               |
|                            | p-value | 0.07         | 0.22         | 0.95         | 0.04         | 0.20        | 0.44        | 0.13         | 0.04         | 0.23                    | 0.31                    | 0.62                | 0.93                |
| Median Household Income    | r       | <b>-0.38</b> | -0.03        | 0.04         | 0.22         | -0.05       | -0.06       | -0.12        | <b>-0.34</b> | -0.24                   | -0.23                   | -0.01               | 0.04                |
|                            | p-value | 0.00         | 0.84         | 0.75         | 0.09         | 0.72        | 0.63        | 0.34         | 0.01         | 0.06                    | 0.07                    | 0.94                | 0.74                |
| % Populatoin < 5 yrs Age   | r       | <b>0.51</b>  | -0.28        | 0.25         | -0.13        | 0.14        | 0.19        | <b>0.31</b>  | <b>0.46</b>  | <b>0.46</b>             | <b>0.43</b>             | <b>0.31</b>         | 0.25                |
|                            | p-value | 0.00         | 0.03         | 0.05         | 0.31         | 0.29        | 0.14        | 0.02         | 0.00         | 0.00                    | 0.00                    | 0.01                | 0.06                |
| % Renter Occupied          | r       | <b>0.46</b>  | -0.19        | 0.23         | -0.02        | 0.14        | <b>0.38</b> | 0.30         | <b>0.49</b>  | <b>0.42</b>             | <b>0.41</b>             | 0.29                | 0.23                |
|                            | p-value | 0.00         | 0.14         | 0.07         | 0.87         | 0.29        | 0.00        | 0.02         | 0.00         | 0.00                    | 0.00                    | 0.02                | 0.07                |
| Vulnerability Index        | r       | <b>0.42</b>  | -0.17        | 0.06         | -0.24        | 0.15        | 0.11        | 0.26         | <b>0.42</b>  | <b>0.31</b>             | 0.29                    | 0.13                | 0.05                |
|                            | p-value | 0.00         | 0.19         | 0.67         | 0.07         | 0.25        | 0.39        | 0.04         | 0.00         | 0.01                    | 0.02                    | 0.30                | 0.68                |

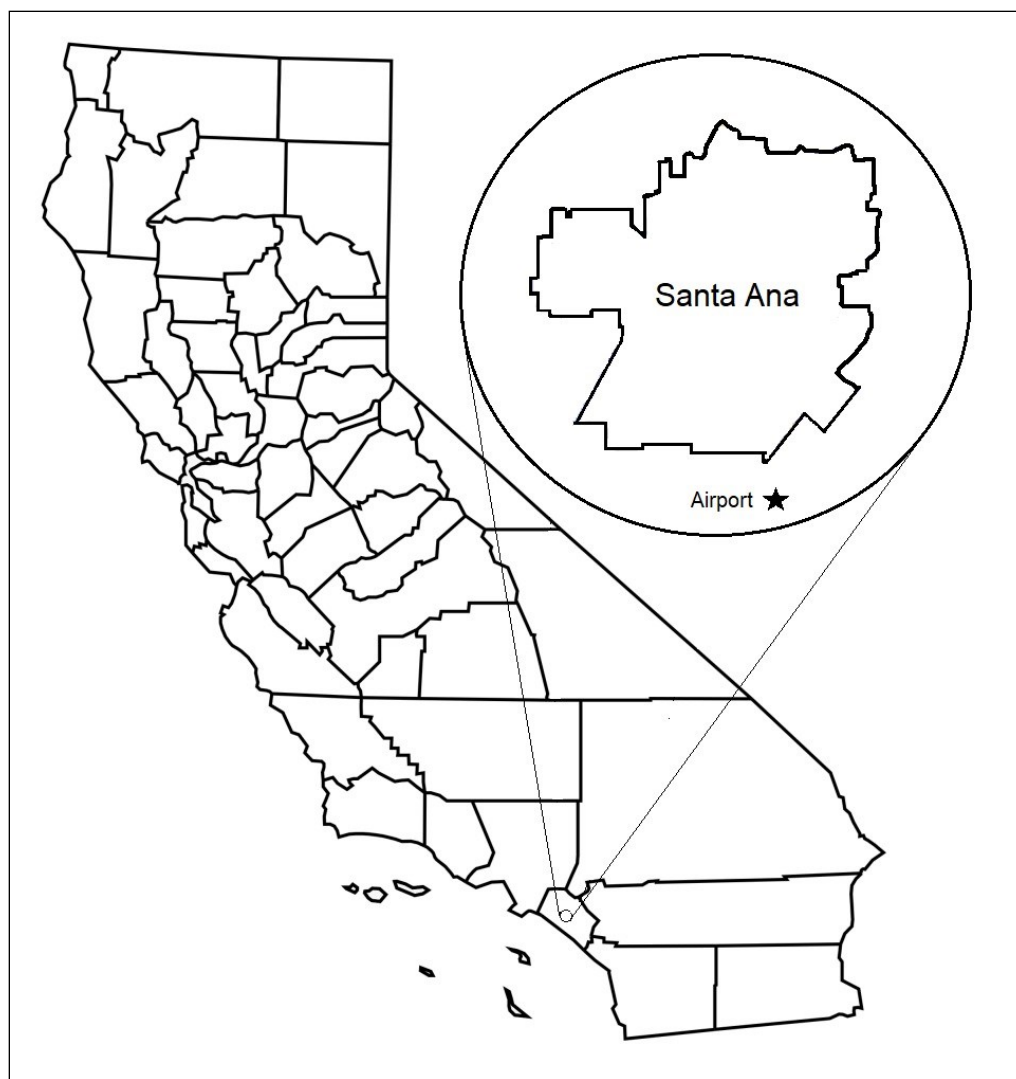

**Figure S1.** County-level map of California showing the location of Santa Ana relative to the nearest airport (John Wayne Airport).

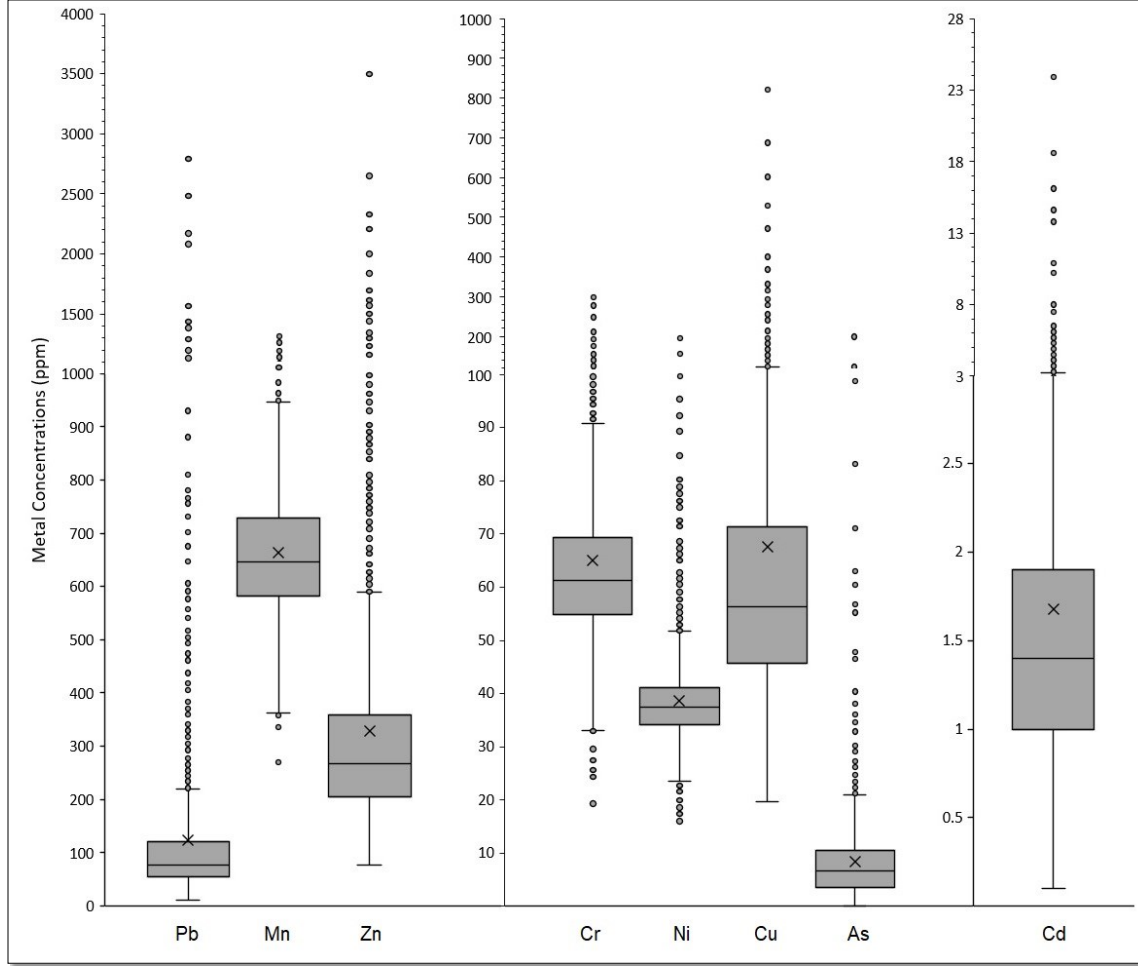

**Figure S2.** Boxplots of concentrations for heavy metals in soil samples (n=1,528). The centerline and “X” symbols indicate the sample median and mean, respectively. Lower and upper boundaries of each box indicate the interquartile range (IQR) of the sample. The lower and upper whiskers indicate the minimum and maximum data points after excluding outliers as defined as  $Q_1 - 1.5 \times IQR$  and  $Q_3 + 1.5 \times IQR$ . Outliers are depicted as individual points.

**Table S3.** Hazard Quotient (HQ) and Hazard Index (HI) values for child, adult, and total non-carcinogenic risk based on lower- and upper-bound RfD values.

|                      | Lower RfDs           |                      |                      |                      | Upper RfDs           |                      |                      |                      |
|----------------------|----------------------|----------------------|----------------------|----------------------|----------------------|----------------------|----------------------|----------------------|
|                      | HQ <sub>ing.</sub>   | HQ <sub>inh.</sub>   | HQ <sub>derm.</sub>  | HI                   | HQ <sub>ing.</sub>   | HQ <sub>inh.</sub>   | HQ <sub>derm.</sub>  | HI                   |
| <u>Adults</u>        |                      |                      |                      |                      |                      |                      |                      |                      |
| Pb                   | $4.2 \times 10^{-2}$ | -                    | $8.9 \times 10^{-3}$ | $5.1 \times 10^{-2}$ | $4.2 \times 10^{-2}$ | -                    | $8.9 \times 10^{-3}$ | $5.1 \times 10^{-2}$ |
| As                   | $3.3 \times 10^{-2}$ | $3.9 \times 10^{-4}$ | $2.2 \times 10^{-2}$ | $5.6 \times 10^{-2}$ | $3.3 \times 10^{-2}$ | $3.9 \times 10^{-4}$ | $2.2 \times 10^{-2}$ | $5.6 \times 10^{-2}$ |
| Mn                   | $5.7 \times 10^{-3}$ | $9.3 \times 10^{-3}$ | $1.2 \times 10^{-3}$ | $1.6 \times 10^{-2}$ | $3.3 \times 10^{-2}$ | $9.3 \times 10^{-3}$ | $7.0 \times 10^{-3}$ | $4.9 \times 10^{-2}$ |
| Cr                   | $5.2 \times 10^{-5}$ | -                    | $1.1 \times 10^{-5}$ | $6.3 \times 10^{-5}$ | $2.6 \times 10^{-2}$ | $4.6 \times 10^{-4}$ | $5.5 \times 10^{-3}$ | $3.2 \times 10^{-2}$ |
| Ni                   | $2.3 \times 10^{-3}$ | $1.4 \times 10^{-3}$ | $4.9 \times 10^{-4}$ | $4.2 \times 10^{-3}$ | $2.3 \times 10^{-3}$ | $1.4 \times 10^{-3}$ | $4.9 \times 10^{-4}$ | $4.2 \times 10^{-3}$ |
| Cu                   | $2.0 \times 10^{-3}$ | -                    | $4.3 \times 10^{-4}$ | $2.5 \times 10^{-3}$ | $2.0 \times 10^{-3}$ | -                    | $4.3 \times 10^{-4}$ | $2.5 \times 10^{-3}$ |
| Cd                   | $2.0 \times 10^{-3}$ | $1.2 \times 10^{-4}$ | $4.3 \times 10^{-4}$ | $2.6 \times 10^{-3}$ | $2.0 \times 10^{-3}$ | $1.2 \times 10^{-4}$ | $4.3 \times 10^{-4}$ | $2.6 \times 10^{-3}$ |
| Zn                   | $1.3 \times 10^{-3}$ | -                    | $2.8 \times 10^{-4}$ | $1.6 \times 10^{-3}$ | $1.3 \times 10^{-3}$ | -                    | $2.8 \times 10^{-4}$ | $1.6 \times 10^{-3}$ |
| All Metals           | $8.9 \times 10^{-2}$ | $1.1 \times 10^{-2}$ | $3.4 \times 10^{-2}$ | $1.3 \times 10^{-1}$ | $1.4 \times 10^{-1}$ | $1.2 \times 10^{-2}$ | $4.5 \times 10^{-2}$ | $2.0 \times 10^{-1}$ |
| <u>Child</u>         |                      |                      |                      |                      |                      |                      |                      |                      |
| Pb                   | $4.5 \times 10^{-1}$ | -                    | $5.3 \times 10^{-2}$ | $5.0 \times 10^{-1}$ | $4.5 \times 10^{-1}$ | -                    | $5.3 \times 10^{-2}$ | $5.0 \times 10^{-1}$ |
| As                   | $3.5 \times 10^{-1}$ | $1.3 \times 10^{-3}$ | $1.3 \times 10^{-1}$ | $4.9 \times 10^{-1}$ | $3.5 \times 10^{-1}$ | $1.3 \times 10^{-3}$ | $1.3 \times 10^{-1}$ | $4.9 \times 10^{-1}$ |
| Mn                   | $6.1 \times 10^{-2}$ | $3.2 \times 10^{-2}$ | $7.2 \times 10^{-3}$ | $1.0 \times 10^{-1}$ | $3.5 \times 10^{-1}$ | $3.2 \times 10^{-2}$ | $4.2 \times 10^{-2}$ | $4.3 \times 10^{-1}$ |
| Cr                   | $5.5 \times 10^{-4}$ | -                    | $6.6 \times 10^{-5}$ | $6.2 \times 10^{-4}$ | $2.8 \times 10^{-1}$ | $1.6 \times 10^{-3}$ | $3.3 \times 10^{-2}$ | $3.1 \times 10^{-1}$ |
| Ni                   | $2.5 \times 10^{-2}$ | $4.6 \times 10^{-3}$ | $2.9 \times 10^{-3}$ | $3.2 \times 10^{-2}$ | $2.5 \times 10^{-2}$ | $4.6 \times 10^{-3}$ | $2.9 \times 10^{-3}$ | $3.2 \times 10^{-2}$ |
| Cu                   | $2.2 \times 10^{-2}$ | -                    | $2.6 \times 10^{-3}$ | $2.4 \times 10^{-2}$ | $2.2 \times 10^{-2}$ | -                    | $2.6 \times 10^{-3}$ | $2.4 \times 10^{-2}$ |
| Cd                   | $2.2 \times 10^{-2}$ | $4.1 \times 10^{-4}$ | $2.6 \times 10^{-3}$ | $2.5 \times 10^{-2}$ | $2.2 \times 10^{-2}$ | $4.1 \times 10^{-4}$ | $2.6 \times 10^{-3}$ | $2.5 \times 10^{-2}$ |
| Zn                   | $1.4 \times 10^{-2}$ | -                    | $1.7 \times 10^{-3}$ | $1.6 \times 10^{-2}$ | $1.4 \times 10^{-2}$ | -                    | $1.7 \times 10^{-3}$ | $1.6 \times 10^{-2}$ |
| All Metals           | $9.5 \times 10^{-1}$ | $3.8 \times 10^{-2}$ | $2.0 \times 10^{-1}$ | $1.2 \times 10^{+0}$ | $1.5 \times 10^{+0}$ | $4.0 \times 10^{-2}$ | $2.7 \times 10^{-1}$ | $1.8 \times 10^{+0}$ |
| <u>Adult + Child</u> |                      |                      |                      |                      |                      |                      |                      |                      |
| All Metals           | $1.0 \times 10^{+0}$ | $4.9 \times 10^{-2}$ | $2.4 \times 10^{-1}$ | $1.3 \times 10^{+0}$ | $1.7 \times 10^{+0}$ | $5.1 \times 10^{-2}$ | $3.2 \times 10^{-1}$ | $2.0 \times 10^{+0}$ |

**Table S4.** Estimated child, adult, and total carcinogenic risk based on lower- and upper-bound cancer slope factors.

|                      | Lower CSFs           |                       |                       |                           | Upper CSFs           |                       |                       |                           |
|----------------------|----------------------|-----------------------|-----------------------|---------------------------|----------------------|-----------------------|-----------------------|---------------------------|
|                      | Risk <sub>ing.</sub> | Risk <sub>inh.</sub>  | Risk <sub>derm.</sub> | Risk <sub>AllRoutes</sub> | Risk <sub>ing.</sub> | Risk <sub>inh.</sub>  | Risk <sub>derm.</sub> | Risk <sub>AllRoutes</sub> |
| <u>Adults</u>        |                      |                       |                       |                           |                      |                       |                       |                           |
| Pb                   | $3.6 \times 10^{-7}$ | $2.6 \times 10^{-10}$ | $7.6 \times 10^{-8}$  | $3.6 \times 10^{-7}$      | $3.6 \times 10^{-7}$ | $2.6 \times 10^{-10}$ | $7.6 \times 10^{-8}$  | $4.3 \times 10^{-7}$      |
| As                   | $4.3 \times 10^{-6}$ | $5.0 \times 10^{-9}$  | $2.9 \times 10^{-6}$  | $7.1 \times 10^{-6}$      | $2.7 \times 10^{-5}$ | $5.0 \times 10^{-9}$  | $1.8 \times 10^{-5}$  | $4.5 \times 10^{-5}$      |
| Cr                   | -                    | -                     | -                     | -                         | $9.3 \times 10^{-6}$ | $1.7 \times 10^{-6}$  | $2.0 \times 10^{-6}$  | $1.3 \times 10^{-5}$      |
| Ni                   | $1.2 \times 10^{-5}$ | $1.8 \times 10^{-9}$  | $2.5 \times 10^{-6}$  | $1.5 \times 10^{-5}$      | $1.2 \times 10^{-5}$ | $1.8 \times 10^{-9}$  | $2.5 \times 10^{-6}$  | $1.5 \times 10^{-5}$      |
| Cd                   |                      | $1.3 \times 10^{-10}$ |                       | $1.3 \times 10^{-10}$     |                      | $1.3 \times 10^{-9}$  |                       | $1.3 \times 10^{-9}$      |
| All Metals           | $1.7 \times 10^{-5}$ | $7.1 \times 10^{-9}$  | $5.4 \times 10^{-6}$  | $2.2 \times 10^{-5}$      | $4.9 \times 10^{-5}$ | $1.7 \times 10^{-6}$  | $2.3 \times 10^{-5}$  | $7.3 \times 10^{-5}$      |
| <u>Child</u>         |                      |                       |                       |                           |                      |                       |                       |                           |
| Pb                   | $1.1 \times 10^{-6}$ | $2.6 \times 10^{-10}$ | $1.4 \times 10^{-7}$  | $1.1 \times 10^{-6}$      | $1.1 \times 10^{-6}$ | $2.6 \times 10^{-10}$ | $1.4 \times 10^{-7}$  | $1.3 \times 10^{-6}$      |
| As                   | $1.4 \times 10^{-5}$ | $5.1 \times 10^{-9}$  | $5.2 \times 10^{-6}$  | $1.9 \times 10^{-5}$      | $8.6 \times 10^{-5}$ | $5.1 \times 10^{-9}$  | $3.3 \times 10^{-5}$  | $1.2 \times 10^{-4}$      |
| Cr                   | -                    | -                     | -                     | -                         | $3.0 \times 10^{-5}$ | $1.7 \times 10^{-6}$  | $3.5 \times 10^{-6}$  | $3.5 \times 10^{-5}$      |
| Ni                   | $3.9 \times 10^{-5}$ | $1.8 \times 10^{-9}$  | $4.6 \times 10^{-6}$  | $4.3 \times 10^{-5}$      | $3.9 \times 10^{-5}$ | $1.8 \times 10^{-9}$  | $4.6 \times 10^{-6}$  | $4.3 \times 10^{-5}$      |
| Cd                   |                      | $1.3 \times 10^{-10}$ |                       | $1.3 \times 10^{-10}$     |                      | $1.3 \times 10^{-9}$  |                       | $1.3 \times 10^{-9}$      |
| All Metals           | $5.3 \times 10^{-5}$ | $7.3 \times 10^{-9}$  | $9.8 \times 10^{-6}$  | $6.3 \times 10^{-5}$      | $1.6 \times 10^{-4}$ | $1.7 \times 10^{-6}$  | $4.1 \times 10^{-5}$  | $2.0 \times 10^{-4}$      |
| <u>Adult + Child</u> |                      |                       |                       |                           |                      |                       |                       |                           |
| All Metals           | $7.0 \times 10^{-5}$ | $1.4 \times 10^{-8}$  | $1.5 \times 10^{-5}$  | $8.5 \times 10^{-5}$      | $2.0 \times 10^{-4}$ | $3.4 \times 10^{-6}$  | $6.4 \times 10^{-5}$  | $2.7 \times 10^{-4}$      |

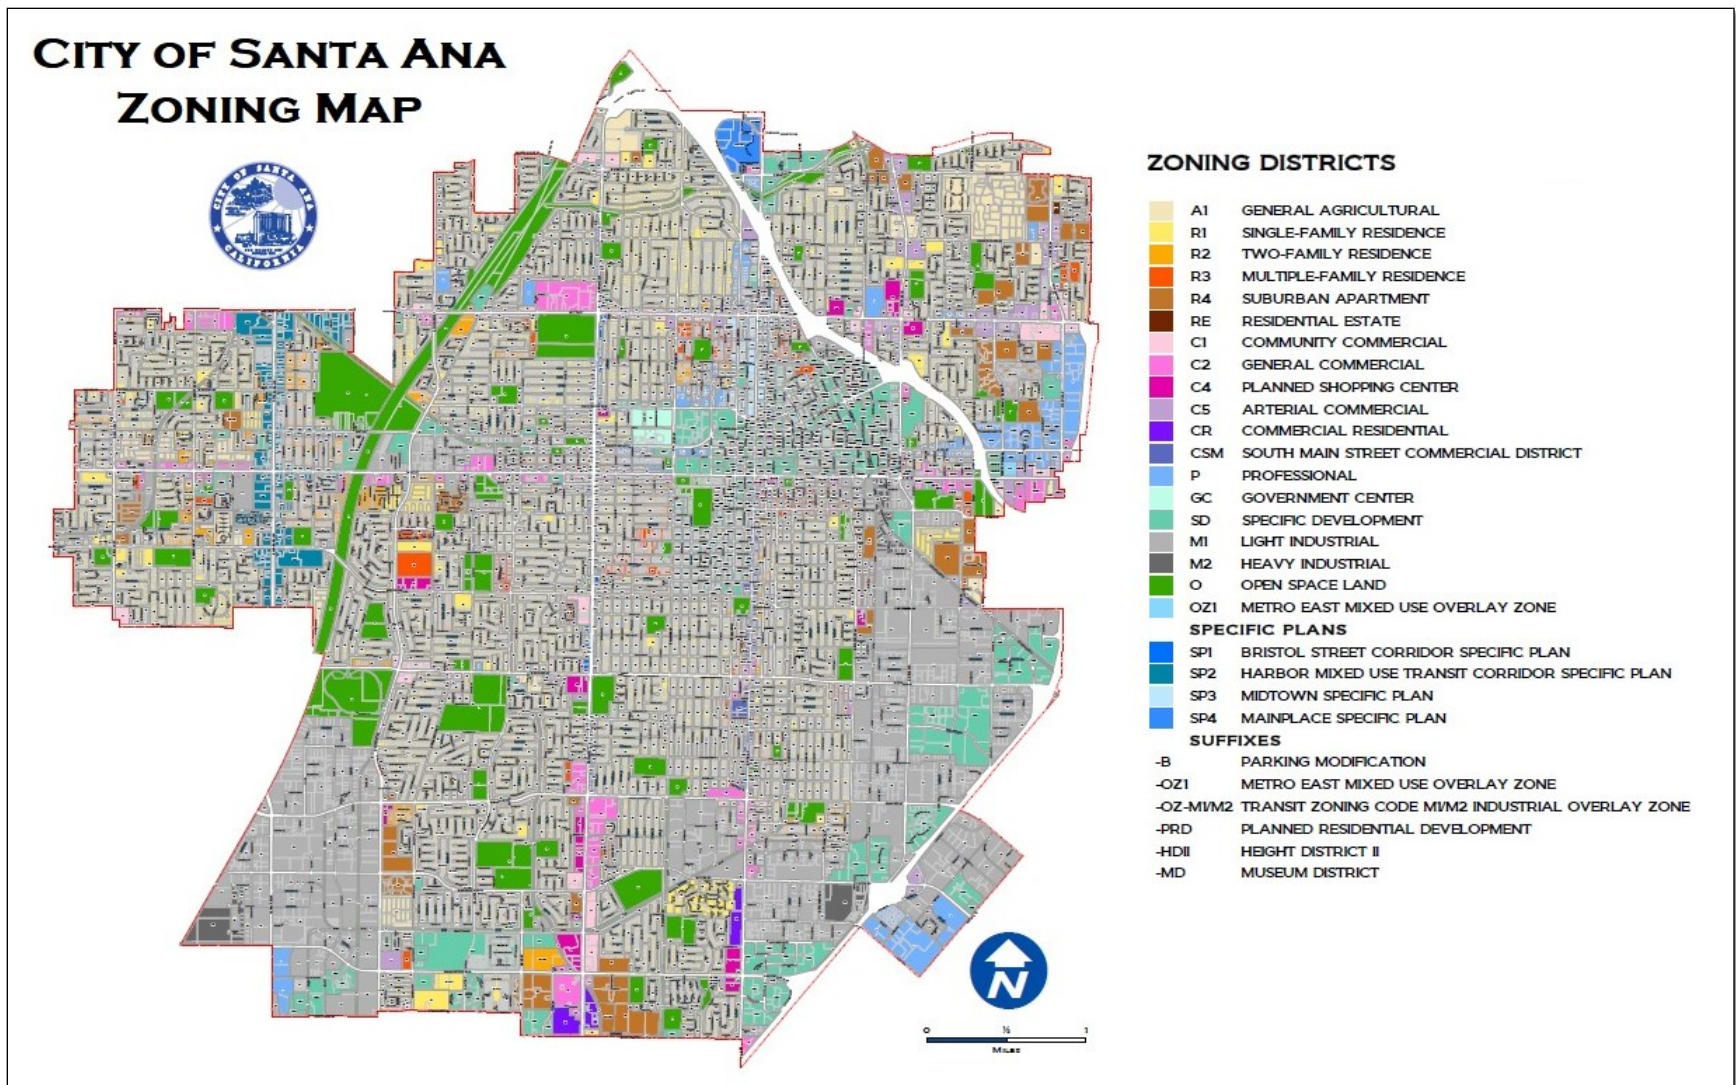

Figure S3. Zoning map of Santa Ana, showing multiple landuse types throughout the city (Source: City of Santa Ana, Open-Source GIS Data).

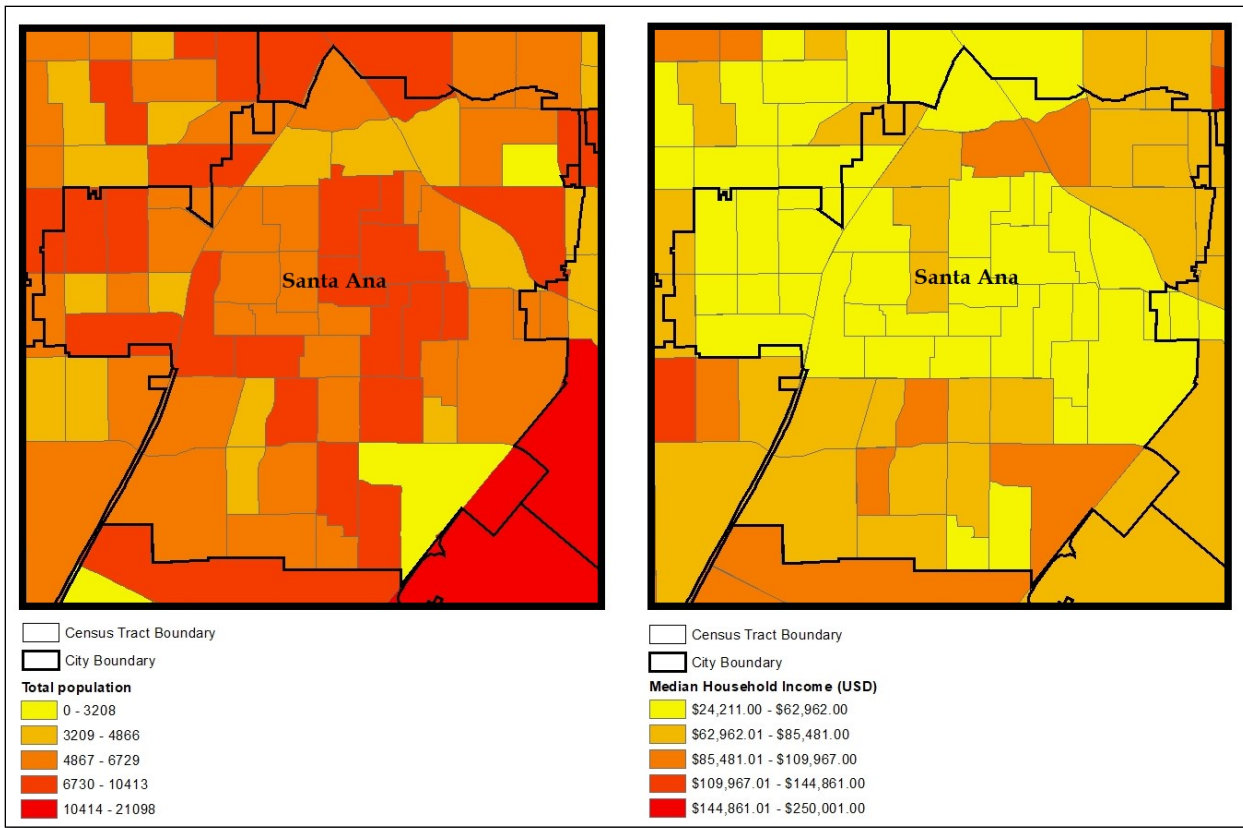

Figure S4. Total population and median household income by Census tract in Santa Ana, CA.
