# Supplementary figures and images for: Risk assessment of soil heavy metal contamination at the census tract level in the city of Santa Ana, CA: implications for health and environmental justice
Source: Royal Society of Chemistry journal article supplement (doi:10.1039/d1em00007a), 2021-01-01

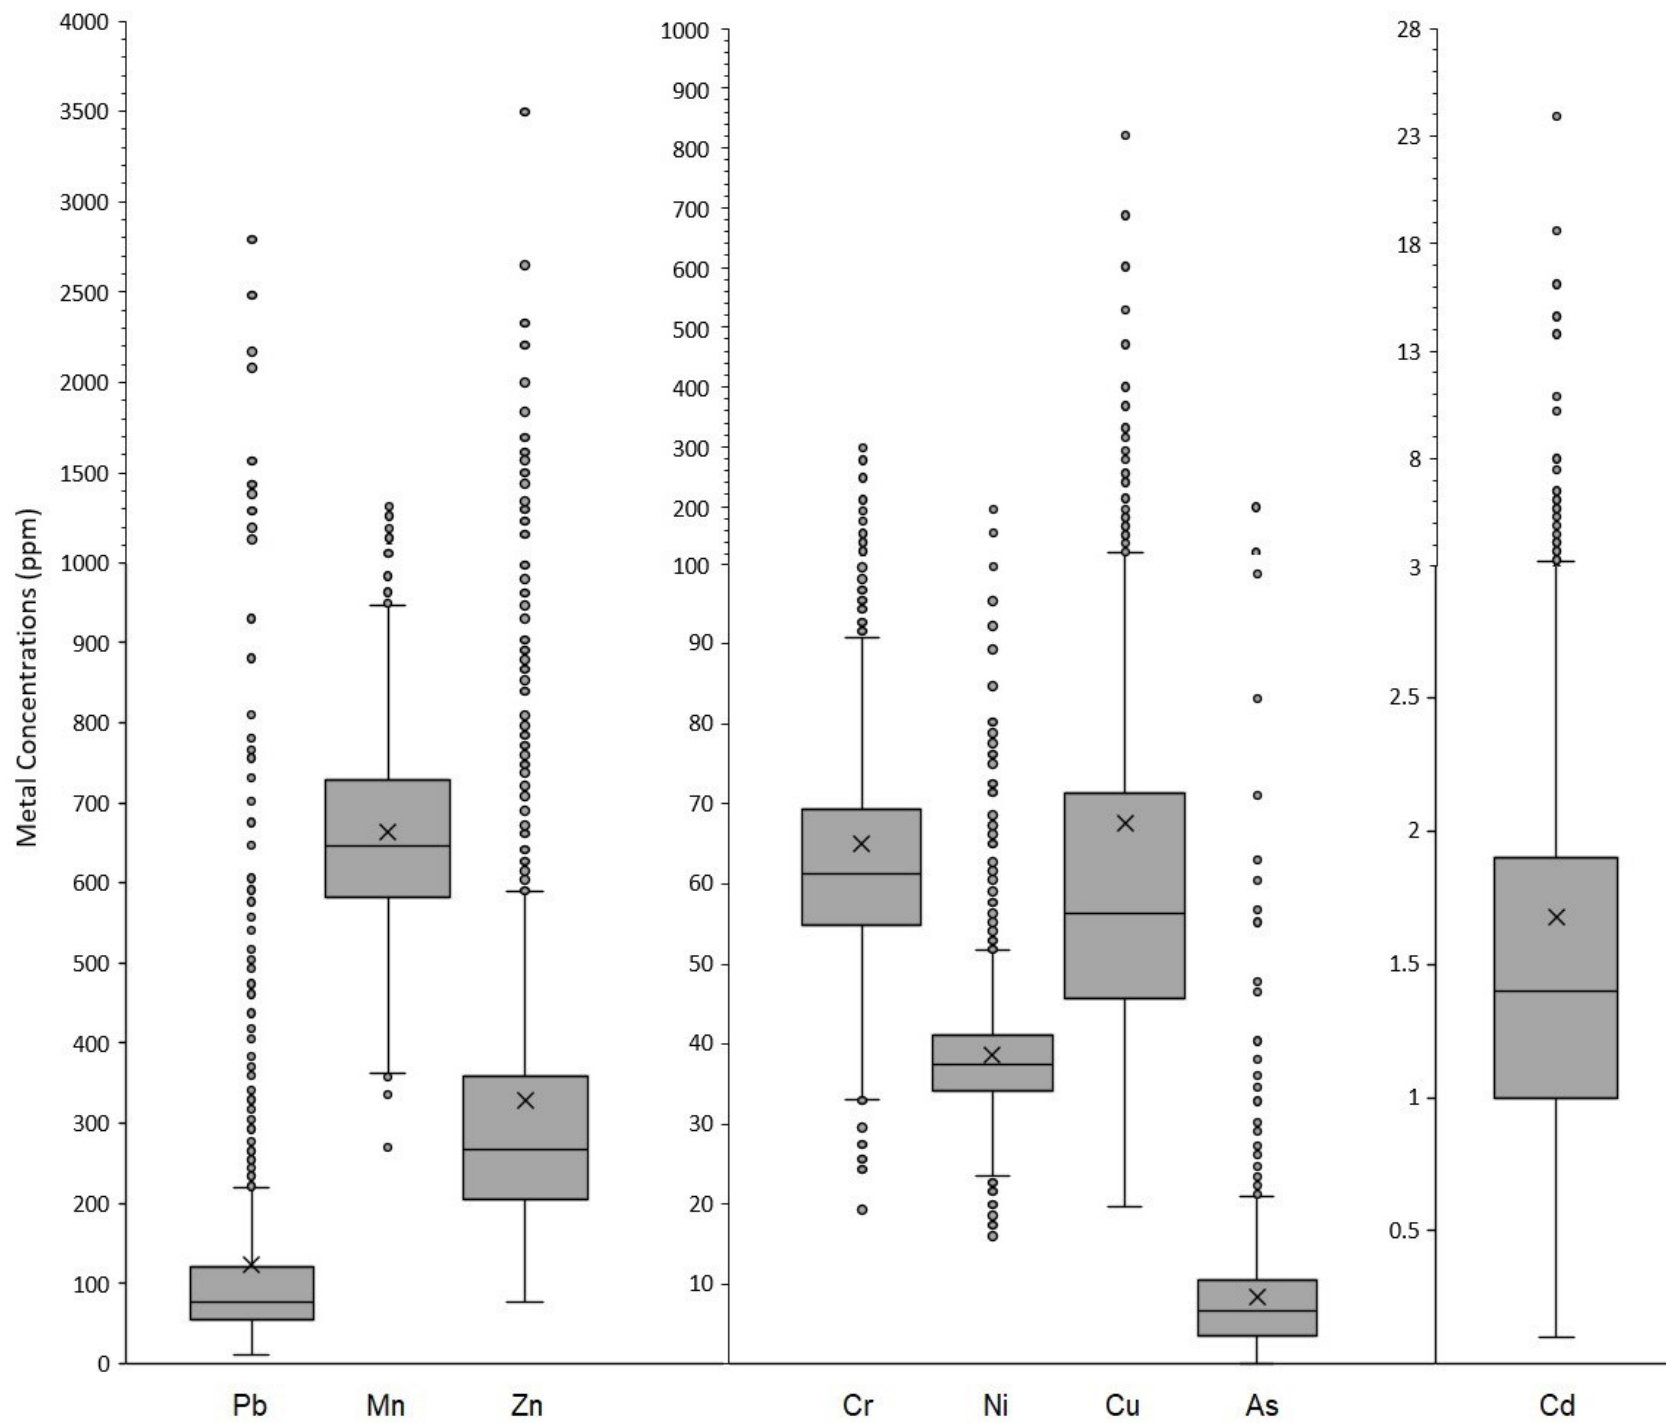

Supplement: d1em00007a3.pdf [file d1em00007a3.pdf]
